# Supplementary material
Source: PubMed Central journal article supplement (PMC4265573)
Supplement: NIHMS623906-supplement-supplement_1.pdf [file NIHMS623906-supplement-supplement_1.pdf]

# Antidepressant Use in Cancer Patients

## Appendix

**Supplemental Table A1. Multivariable Logistic Regression for Exposure to SSRI/SNRIs**

| Covariate                      | Case-finding method*                 | (1)  |                | (2)  |                | (3)  |                | (4)  |                | (5)  |                |
|--------------------------------|--------------------------------------|------|----------------|------|----------------|------|----------------|------|----------------|------|----------------|
|                                |                                      | OR   | <i>P</i> value |
| <b>Depression diathesis</b>    |                                      |      |                |      |                |      |                |      |                |      |                |
| Depressive symptoms*           | Yes vs. no                           | 1.71 | <0.001         | 1.39 | 0.017          | 1.04 | 0.743          | 1.74 | <0.001         | 2.20 | <0.001         |
| Family history of depression   | Yes vs. no                           | 2.16 | <0.001         | 2.19 | <0.001         | 2.28 | <0.001         | 2.22 | <0.001         | 2.23 | <0.001         |
| <b>Comorbidity indicators</b>  |                                      |      |                |      |                |      |                |      |                |      |                |
| Number of medicines            | 5-9 vs. 0-4                          | 2.10 | <0.001         | 2.16 | <0.001         | 2.14 | <0.001         | 2.15 | <0.001         | 2.23 | <0.001         |
|                                | ≥10 vs. 0-4                          | 3.27 | <0.001         | 3.39 | <0.001         | 3.45 | <0.001         | 3.37 | <0.001         | 3.49 | <0.001         |
|                                | Missing vs. 0-4                      | 1.52 | 0.039          | 1.55 | 0.034          | 1.52 | 0.048          | 1.43 | 0.083          | 1.50 | 0.061          |
| Pain management index          | Adequately treated vs. under-treated | 1.10 | 0.502          | 1.06 | 0.655          | 1.00 | 0.991          | 1.01 | 0.925          | 1.00 | 0.971          |
|                                | Missing vs. under-treated            | 1.74 | 0.065          | 1.79 | 0.059          | 1.31 | 0.351          | 1.86 | 0.018          | 1.72 | 0.050          |
| Exposure to steroids           | Yes vs. no                           | 0.79 | 0.125          | 0.77 | 0.100          | 0.76 | 0.109          | 0.74 | 0.063          | 0.77 | 0.111          |
| Exposure to anxiolytics        | Yes vs. no                           | 2.04 | <0.001         | 2.07 | <0.001         | 2.17 | <0.001         | 2.03 | <0.001         | 2.15 | <0.001         |
| Exposure to sedatives          | Yes vs. no                           | 2.13 | <0.001         | 2.08 | <0.001         | 2.16 | <0.001         | 2.10 | <0.001         | 2.11 | <0.001         |
| Exposure to beta-blockers      | Yes vs. no                           | 0.84 | 0.130          | 0.84 | 0.139          | 0.85 | 0.164          | 0.88 | 0.269          | 0.87 | 0.206          |
| <b>Cancer treatment status</b> |                                      |      |                |      |                |      |                |      |                |      |                |
| Current therapy                | Within 1 month vs. no                | 0.82 | 0.220          | 0.82 | 0.249          | 0.80 | 0.175          | 0.81 | 0.203          | 0.83 | 0.274          |
|                                | Within 1 year vs. no                 | 0.88 | 0.361          | 0.88 | 0.397          | 0.88 | 0.358          | 0.89 | 0.447          | 0.93 | 0.605          |
|                                | >1 year vs. no                       | 1.54 | 0.003          | 1.53 | 0.004          | 1.51 | 0.007          | 1.57 | 0.002          | 1.57 | 0.004          |
| Prior systemic therapy         | Yes vs. no                           | 1.46 | 0.002          | 1.49 | 0.001          | 1.45 | 0.002          | 1.48 | 0.002          | 1.50 | 0.001          |
| Prior radiotherapy             | Yes vs. no                           | 1.13 | 0.290          | 1.12 | 0.327          | 1.14 | 0.234          | 1.09 | 0.434          | 1.11 | 0.382          |
| <b>Clinical/Demographic</b>    |                                      |      |                |      |                |      |                |      |                |      |                |
| Type of institution            | CCOP vs. academic                    | 1.84 | 0.017          | 1.83 | 0.014          | 1.83 | 0.017          | 1.80 | 0.011          | 1.83 | 0.018          |
|                                | MBCCOP vs. academic                  | 1.47 | 0.238          | 1.51 | 0.212          | 1.55 | 0.186          | 1.49 | 0.215          | 1.52 | 0.232          |
| Race/ethnicity                 | other vs. Non-Hispanic White         | 0.50 | <0.001         | 0.49 | <0.001         | 0.50 | <0.001         | 0.51 | <0.001         | 0.49 | <0.001         |
| Sex                            | Male vs. Female                      | 0.54 | <0.001         | 0.53 | <0.001         | 0.53 | <0.001         | 0.55 | <0.001         | 0.54 | <0.001         |
| Age                            | <55 vs. ≥55                          | 1.26 | 0.038          | 1.28 | 0.025          | 1.31 | 0.015          | 1.25 | 0.051          | 1.28 | 0.022          |
| Duration of cancer             | Continuous (years)                   | 0.99 | 0.488          | 0.99 | 0.542          | 0.99 | 0.501          | 0.99 | 0.404          | 0.99 | 0.602          |
| Disease status                 | advanced vs. Non-advanced            | 0.91 | 0.270          | 0.91 | 0.247          | 0.91 | 0.252          | 0.86 | 0.093          | 0.89 | 0.186          |
| ECOG PS                        | 1-4 vs. 0                            | 0.93 | 0.541          | 0.94 | 0.598          | 0.99 | 0.905          | 0.95 | 0.649          | 0.96 | 0.759          |
| Weight loss in past 6 months   | >5% vs. ≤5%                          | 0.82 | 0.328          | 0.82 | 0.316          | 0.83 | 0.337          | 0.81 | 0.259          | 0.86 | 0.453          |
| Participating in counseling    | Yes vs. no                           | 1.63 | 0.037          | 1.69 | 0.023          | 1.76 | 0.015          | 1.58 | 0.050          | 1.59 | 0.050          |
| Participating in support       | Yes vs. no                           | 1.08 | 0.685          | 1.08 | 0.668          | 1.09 | 0.624          | 1.17 | 0.389          | 1.11 | 0.569          |
| Perceived QOL                  | Poor vs. good                        | 1.33 | 0.012          | 1.39 | 0.004          | 1.49 | 0.001          | 1.38 | 0.008          | 1.42 | 0.003          |

Abbreviations: SSRI, serotonin-reuptake inhibitor; SNRI, serotonin-norepinephrine reuptake inhibitor; ECOG PS, Eastern Cooperative Oncology

Group performance status; QOL, quality of life; CCOP, Community Clinical Oncology Program; MBCCOP, Minority-Based Community

Clinical Oncology Program

\*Depressive symptoms case-finding category: (1) sadness/ depression ≥ 4; (2) distress ≥ 4; (3) interference with mood ≥ 7 or enjoyment ≥ 7; (4)

presence of psychological distress (per clinician-report); (5) depression being listed as one of top three symptoms (per clinician-report)
